# Supplementary material for: Interaction of CO 2 concentrations and water stress in semiarid plants causes diverging response in instantaneous water use efficiency and carbon isotope composition
Source: Copernicus journal article supplement (doi:10.5194/bg-14-3431-2017), 2017-07-20
Supplement: Supplementary file 1 [file Raw data.xls]

## Sheet: P. orientalis
P. orientalis	Obs	HHMMSS	FTime	EBal?	Photo	Cond	Ci	Trmmol	WUEge	VpdL	CTleaf	Area	BLC_1	StmRat	BLCond	Tair	Tleaf	TBlk	CO2R	CO2S	H2OR	H2OS	RH_R	RH_S	Flow	PARi	PARo	Press	CsMch	HsMch	StableF	BLCslope	BLCoffst	f_parin	f_parout	alphaK	Status	fda	Trans	Tair_K	Twall_K	R(W/m2)	Tl-Ta	SVTleaf	h2o_i	h20diff	CTair	SVTair	CndTotal
	in	in	in	in	out	out	out	out		out	out	in	out	in	out	in	in	in	in	in	in	in	in	in	in	in	in	in	in	in	in	in	in	in	in	in	in	out	out	out	out	out	out	out	out	out	out	out	out
400-1	1	10:15:31	1266	0	2.48094	0.00958374	173.361	0.342701	7.23937	3.46654	31.9116	6	1.42	1	2.84	31.6851	31.9116	31.5325	614.487	611.259	12.4883	12.8943	26.5268	27.3891	499.988	323.906	314.561	99.6349	-3.68349	0.670669	0.666667	-0.219565	2.73739	1	0	0.19	111105	0.833313	0.000342701	305.062	304.835	61.5421	0.512315	4.75126	47.6867	34.7924	31.7984	4.72086	0.00955151
	2	10:15:31	1266	0	2.48094	0.00958374	173.361	0.342701	7.23937	3.46654	31.9116	6	1.42	1	2.84	31.6851	31.9116	31.5325	614.487	611.259	12.4883	12.8943	26.5268	27.3891	499.988	323.906	314.561	99.6349	-3.68349	0.670669	0.666667	-0.219565	2.73739	1	0	0.19	111105	0.833313	0.000342701	305.062	304.835	61.5421	0.512315	4.75126	47.6867	34.7924	31.7984	4.72086	0.00955151
	3	10:15:32	1266.5	0	2.47229	0.0095275	172.576	0.340685	7.25682	3.46644	31.911	6	1.42	1	2.84	31.6868	31.911	31.5343	614.661	611.444	12.4897	12.8933	26.5273	27.3845	499.978	322.626	314.411	99.6354	-3.68349	0.670669	0.666667	-0.219565	2.73739	1	0	0.19	111105	0.833297	0.000340685	305.061	304.837	61.2989	0.510848	4.75107	47.6846	34.7913	31.7989	4.721	0.00949564
400-2	1	10:24:54	554	0	3.10623	0.0189276	324.472	0.695353	4.46713	3.57419	31.9618	6	1.42	1	2.84	31.7526	31.9618	31.6094	620.599	616.357	11.1262	11.9507	23.5404	25.2848	499.981	461.482	510.255	99.6233	-3.1761	0.602017	1	-0.219565	2.73739	1	0	0.19	111105	0.833302	0.000695353	305.112	304.903	87.6815	0.638981	4.76476	47.8277	35.8771	31.8572	4.73662	0.0188023
	2	10:24:54	554.5	0	3.00286	0.0188887	332.514	0.693943	4.32724	3.57425	31.9609	6	1.42	1	2.84	31.7531	31.9609	31.6098	620.49	616.373	11.1249	11.9477	23.5369	25.2777	499.978	461.225	510.113	99.6233	-3.1761	0.602017	0.666667	-0.219565	2.73739	1	0	0.19	111105	0.833297	0.000693943	305.111	304.903	87.6328	0.639344	4.76451	47.8253	35.8776	31.857	4.73656	0.0187639
400-3	4	10:27:13	133	0	3.58962	0.0453788	494.633	1.63896	2.19018	3.54354	32.1782	6	1.42	1	2.84	31.711	32.1782	31.551	662.249	656.65	10.9064	12.848	23.1293	27.2468	499.974	203.15	438.563	99.6204	-3.1761	0.602017	0.666667	-0.219565	2.73739	1	0	0.19	111105	0.83329	0.00163896	305.328	304.861	38.5984	-0.46212	4.82347	48.4185	35.5704	31.9446	4.76014	0.0446651
	5	10:27:13	133.5	0	3.55703	0.0452228	495.531	1.63312	2.17805	3.54292	32.174	6	1.42	1	2.84	31.7121	32.174	31.5518	662.398	656.842	10.908	12.8427	23.1311	27.2337	499.969	193.474	430.467	99.6201	-3.1761	0.602017	0.666667	-0.219565	2.73739	1	0	0.19	111105	0.833281	0.00163312	305.324	304.862	36.7601	-0.479896	4.82231	48.407	35.5643	31.9431	4.75972	0.044514
	6	10:27:14	134	0	3.53414	0.0450637	496.101	1.62701	2.17217	3.54195	32.1687	6	1.42	1	2.84	31.713	32.1687	31.553	662.571	657.047	10.9106	12.838	23.1353	27.2224	499.966	179.286	408.257	99.6198	-3.1761	0.602017	0.666667	-0.219565	2.73739	1	0	0.19	111105	0.833277	0.00162701	305.319	304.863	34.0644	-0.507477	4.82087	48.3927	35.5547	31.9408	4.75912	0.0443598
400-4	32	10:47:22	511	0	5.05252	0.0623943	390.931	1.42681	3.54113	2.26255	28.5669	6	1.42	1	2.84	27.555	28.5669	27.1155	547.277	540.288	14.9774	16.6612	40.3466	44.8825	499.956	372.818	341.669	99.6047	-3.13777	0.789494	0.666667	-0.219565	2.73739	1	0	0.19	111105	0.83326	0.00142681	301.717	300.705	70.8355	-0.0471926	3.92208	39.3764	22.7152	28.061	3.80835	0.061053
	33	10:47:22	511	0	5.05252	0.0623943	390.931	1.42681	3.54113	2.26255	28.5669	6	1.42	1	2.84	27.555	28.5669	27.1155	547.277	540.288	14.9774	16.6612	40.3466	44.8825	499.956	372.818	341.669	99.6047	-3.13777	0.789494	0.666667	-0.219565	2.73739	1	0	0.19	111105	0.83326	0.00142681	301.717	300.705	70.8355	-0.0471926	3.92208	39.3764	22.7152	28.061	3.80835	0.061053
	34	10:47:23	512	0	4.99444	0.0623144	392.473	1.42283	3.51021	2.25914	28.5487	6	1.42	1	2.84	27.5551	28.5487	27.1163	547.399	540.482	14.9747	16.6538	40.3393	44.8626	499.961	391.815	353.703	99.6052	-3.13777	0.789494	0.666667	-0.219565	2.73739	1	0	0.19	111105	0.833268	0.00142283	301.699	300.705	74.4449	-2.60259e-05	3.91794	39.3347	22.6809	28.0519	3.80634	0.0609764
400-5	25	10:56:11	520.5	0	3.96598	0.0529506	409.976	1.04254	3.80414	1.94124	27.8899	6	1.42	1	2.84	25.9825	27.8899	25.5163	552.488	547.044	17.1402	18.3684	50.6415	54.2702	499.956	299.102	348.729	99.5905	-2.02651	0.416001	0.666667	-0.219565	2.73739	1	0	0.19	111105	0.83326	0.00104254	301.04	299.132	56.8295	-0.13404	3.77056	37.8606	19.4922	26.9362	3.56577	0.0519814
	26	10:56:11	521	0	3.98948	0.0530591	409.49	1.04155	3.83035	1.93556	27.8604	6	1.42	1	2.84	25.9828	27.8604	25.5175	552.45	546.978	17.1331	18.3601	50.6194	54.2445	499.968	298.188	349.124	99.5906	-2.02651	0.416001	1	-0.219565	2.73739	1	0	0.19	111105	0.83328	0.00104155	301.01	299.133	56.6556	-0.131424	3.76406	37.7953	19.4352	26.9216	3.56271	0.052086
	27	10:56:12	522	0	3.96121	0.0531851	410.609	1.03833	3.81497	1.92525	27.8061	6	1.42	1	2.84	25.9836	27.8061	25.5193	552.317	546.882	17.1209	18.3441	50.581	54.1949	499.96	296.79	350.551	99.5909	-2.02651	0.416001	1	-0.219565	2.73739	1	0	0.19	111105	0.833266	0.00103833	300.956	299.134	56.3901	-0.125263	3.75215	37.6757	19.3316	26.8949	3.55712	0.0522074
500-1	9	09:50:54	171.5	0	2.83763	0.0150409	278.234	0.475952	5.96201	3.05808	30.8282	6	1.42	1	2.84	30.3555	30.8282	30.2017	607.642	603.892	13.6621	14.2251	31.1277	32.4105	499.992	361.109	360.995	99.0702	-0.316272	0.43166	0.666667	-0.219565	2.73739	1	0	0.19	111105	0.833321	0.000475952	303.978	303.506	68.6108	0.492571	4.46737	45.0929	30.8679	30.5918	4.40745	0.0149617
	10	09:50:54	172	0	2.81401	0.0149461	279.408	0.472389	5.95699	3.05441	30.8125	6	1.42	1	2.84	30.357	30.8125	30.2033	608.178	604.458	13.6631	14.222	31.1276	32.4006	499.997	365.281	353.074	99.0701	-0.316272	0.43166	0.666667	-0.219565	2.73739	1	0	0.19	111105	0.833329	0.000472389	303.963	303.507	69.4033	0.506169	4.46338	45.0528	30.8308	30.5847	4.40566	0.0148679
500-2	19	10:24:46	389	0	3.35908	0.048269	540.075	1.5294	2.19634	3.09379	31.3117	6	1.42	1	2.84	31.7128	31.3117	31.6479	689.821	684.534	13.319	15.1266	28.0826	31.8939	499.975	372.692	338.791	99.0557	-4.28228	0.503971	1	-0.219565	2.73739	1	0	0.19	111105	0.833292	0.0015294	304.462	304.863	70.8115	0.0969271	4.59217	46.3595	31.2328	31.5122	4.64483	0.0474623
	20	10:24:47	390	0	3.36693	0.0481569	539.572	1.52642	2.20577	3.09484	31.3132	6	1.42	1	2.84	31.714	31.3132	31.6485	689.847	684.553	13.3159	15.12	28.0743	31.8779	499.973	370.858	336.293	99.0561	-4.28228	0.503971	1	-0.219565	2.73739	1	0	0.19	111105	0.833289	0.00152642	304.463	304.864	70.4631	0.0943344	4.59257	46.3633	31.2433	31.5136	4.64519	0.0473539
	21	10:24:47	390.5	0	3.36499	0.0480855	539.5	1.52446	2.20733	3.09539	31.314	6	1.42	1	2.84	31.7148	31.314	31.649	689.877	684.587	13.3149	15.1167	28.0709	31.8694	499.983	366.775	333.874	99.056	-4.28228	0.503971	1	-0.219565	2.73739	1	0	0.19	111105	0.833305	0.00152446	304.464	304.865	69.6872	0.0862262	4.59278	46.3656	31.2489	31.5144	4.6454	0.0472849
500-3	4	10:32:50	473	0	4.39985	0.016852	167.359	0.685116	6.42205	3.91577	33.709	6	1.42	1	2.84	32.4515	33.709	32.3317	618.505	612.722	12.7291	13.5402	25.7386	27.3785	499.994	342.878	497.984	99.0482	-3.49883	0.534291	0.333333	-0.219565	2.73739	1	0	0.19	111105	0.833323	0.000685116	306.859	305.602	65.1468	0.226731	5.2569	53.0741	39.5339	33.0803	5.07494	0.0167526
	5	10:32:51	473.5	0	4.41723	0.0166666	161.594	0.67661	6.52848	3.91006	33.6854	6	1.42	1	2.84	32.453	33.6854	32.333	618.864	613.065	12.727	13.528	25.7319	27.3514	499.988	346.474	500.115	99.0478	-3.49883	0.534291	0.333333	-0.219565	2.73739	1	0	0.19	111105	0.833313	0.00067661	306.835	305.603	65.83	0.24278	5.24997	53.0045	39.4765	33.0692	5.0718	0.0165694
	25	10:43:51	1134.5	0	1.82456	0.0134527	419.405	0.522336	3.49307	3.73338	33.5103	6	1.42	1	2.84	33.066	33.5103	32.9256	673.916	671.306	14.1798	14.7973	27.6924	28.8985	499.992	152.72	325.078	99.0315	-3.43071	0.409982	0.666667	-0.219565	2.73739	1	0	0.19	111105	0.83332	0.000522336	306.66	306.216	29.0168	0.00552984	5.19878	52.4962	37.6989	33.2881	5.13448	0.0133893
	26	10:43:52	1135.5	0	1.82835	0.0132821	416.473	0.51576	3.54497	3.73355	33.5061	6	1.42	1	2.84	33.0696	33.5061	32.9283	674.147	671.538	14.1734	14.7832	27.6743	28.8649	500.005	157.709	330.419	99.0315	-3.43071	0.409982	0.666667	-0.219565	2.73739	1	0	0.19	111105	0.833342	0.00051576	306.656	306.22	29.9647	0.0211649	5.19755	52.4838	37.7007	33.2878	5.1344	0.0132203
	18	10:39:17	860	0	6.35838	0.0320932	370.451	1.14971	5.53044	3.46749	33.0247	6	1.42	1	2.84	32.774	33.0247	32.6755	730.757	722.13	14.7136	16.0712	29.2119	31.9071	499.975	328.708	461.655	99.0361	-3.49883	0.534291	0.333333	-0.219565	2.73739	1	0	0.19	111105	0.833292	0.00114971	306.175	305.924	62.4546	0.101412	5.05912	51.0836	35.0124	32.8994	5.02361	0.0317346
	19	10:39:17	860.5	0	6.3262	0.0316366	367.969	1.13338	5.5817	3.46708	33.021	6	1.42	1	2.84	32.775	33.021	32.6759	731.09	722.516	14.7262	16.0646	29.2353	31.8922	499.962	328.135	461.19	99.0364	-3.49883	0.534291	0.333333	-0.219565	2.73739	1	0	0.19	111105	0.833269	0.00113338	306.171	305.925	62.3457	0.109258	5.05806	51.0727	35.0082	32.898	5.02322	0.0312881
	20	10:39:18	861	0	6.30994	0.0312325	365.143	1.1188	5.63994	3.46628	33.0163	6	1.42	1	2.84	32.7759	33.0163	32.6761	731.453	722.91	14.7381	16.0592	29.2576	31.8801	499.971	327.762	460.819	99.0366	-3.49883	0.534291	0.333333	-0.219565	2.73739	1	0	0.19	111105	0.833285	0.0011188	306.166	305.926	62.2748	0.116763	5.05673	51.0592	35	32.8961	5.02268	0.0308928
	21	10:39:18	861.5	0	6.33271	0.0308652	360.634	1.10553	5.72819	3.46555	33.0125	6	1.42	1	2.84	32.7767	33.0125	32.677	731.874	723.315	14.7502	16.0556	29.2803	31.8716	499.985	327.428	460.576	99.0367	-3.49883	0.534291	0.333333	-0.219565	2.73739	1	0	0.19	111105	0.833309	0.00110553	306.162	305.927	62.2113	0.123543	5.05565	51.0482	34.9926	32.8946	5.02226	0.0305333
500-4	3	11:11:45	353.5	0	3.0433	0.0375359	424.298	0.989399	3.0759	2.5516	31.8222	6	1.42	1	2.84	29.6655	31.8222	29.3603	581.177	576.84	20.8166	21.9779	49.3068	52.0576	499.927	388.42	503.674	98.9915	-3.08574	-0.0285937	0.333333	-0.219565	2.73739	1	0	0.19	111105	0.833211	0.000989399	304.972	302.815	73.7998	0.0479332	4.72723	47.7539	25.776	30.7438	4.4459	0.0370462
	4	11:11:50	359	0	3.05238	0.0323433	406.139	0.830386	3.67586	2.48213	31.5048	6	1.42	1	2.84	29.6695	31.5048	29.3652	583.283	579.042	20.8525	21.8273	49.3805	51.6891	499.926	373.878	489.43	98.9916	-3.08574	-0.0285937	0.333333	-0.219565	2.73739	1	0	0.19	111105	0.83321	0.000830386	304.655	302.819	71.0369	0.14389	4.64286	46.9015	25.0742	30.5871	4.40626	0.0319791
	10	11:14:08	496.5	0	4.63504	0.0621244	459.786	1.33723	3.46615	2.10707	29.9493	6	1.42	1	2.84	29.294	29.9493	28.9472	606.513	599.987	20.0585	21.6286	48.5386	52.338	499.962	368.868	497.034	98.9886	-3.08574	-0.0285937	0.333333	-0.219565	2.73739	1	0	0.19	111105	0.83327	0.00133723	303.099	302.444	70.085	0.038535	4.24806	42.9147	21.286	29.6216	4.16873	0.0607945
	11	11:14:08	497	0	4.62279	0.0618063	459.589	1.33043	3.47467	2.10695	29.944	6	1.42	1	2.84	29.2945	29.944	28.9476	606.584	600.078	20.0545	21.6166	48.5274	52.3073	499.968	368.601	496.895	98.989	-3.08574	-0.0285937	0.333333	-0.219565	2.73739	1	0	0.19	111105	0.83328	0.00133043	303.094	302.445	70.0342	0.0423068	4.24675	42.9013	21.2847	29.6193	4.16816	0.0604899
	12	11:14:09	497.5	0	4.63371	0.0615108	458.829	1.324	3.49979	2.10665	29.9381	6	1.42	1	2.84	29.2952	29.9381	28.9483	606.684	600.169	20.0507	21.6053	48.5163	52.2779	499.969	368.236	496.61	98.9887	-3.08574	-0.0285937	0.333333	-0.219565	2.73739	1	0	0.19	111105	0.833282	0.001324	303.088	302.445	69.9649	0.0457389	4.24533	42.887	21.2818	29.6167	4.16754	0.0602068
	14	11:17:54	723	0	2.38444	0.0702793	524.634	1.50253	1.58695	2.10081	29.5141	6	1.42	1	2.84	28.5929	29.5141	28.2164	603.649	599.706	18.8656	20.6316	47.5401	51.9903	499.952	378.885	460.748	98.983	-3.08574	-0.0285937	0.333333	-0.219565	2.73739	1	0	0.19	111105	0.833253	0.00150253	302.664	301.743	71.9882	-0.0615719	4.14298	41.8555	21.2239	29.0535	4.03424	0.0685822
	15	11:17:55	723.5	0	2.3906	0.0698613	523.924	1.49354	1.60062	2.10047	29.507	6	1.42	1	2.84	28.5935	29.507	28.2171	603.389	599.445	18.8623	20.6178	47.5302	51.9538	499.941	380.111	461.755	98.9828	-3.08574	-0.0285937	0.333333	-0.219565	2.73739	1	0	0.19	111105	0.833235	0.00149354	302.657	301.743	72.2211	-0.0530818	4.14128	41.8384	21.2206	29.0502	4.03348	0.068184
	16	11:17:55	724	0	2.4075	0.0694869	522.966	1.4856	1.62056	2.1003	29.5011	6	1.42	1	2.84	28.5948	29.5011	28.2182	603.114	599.157	18.8591	20.6053	47.5184	51.9182	499.934	380.933	462.787	98.9826	-3.08574	-0.0285937	0.333333	-0.219565	2.73739	1	0	0.19	111105	0.833224	0.0014856	302.651	301.745	72.3772	-0.0461075	4.13987	41.8242	21.2189	29.0479	4.03294	0.0678274
500-5	13	11:22:52	279	0	2.87094	0.0747981	561.629	1.47887	1.9413	1.94881	28.525	6	1.42	1	2.84	27.8529	28.525	27.5282	648.513	643.924	18.1011	19.8408	47.6172	52.1936	499.93	319.994	416.396	98.975	-3.08574	-0.0285937	0.333333	-0.219565	2.73739	1	0	0.19	111105	0.833217	0.00147887	301.675	301.003	60.7988	-0.145543	3.91255	39.5307	19.6899	28.189	3.83684	0.0728787
	14	11:22:52	279.5	0	2.87895	0.0743405	561.073	1.47063	1.95762	1.94958	28.5246	6	1.42	1	2.84	27.8536	28.5246	27.5299	648.514	643.922	18.102	19.832	47.6177	52.1685	499.931	320.44	416.106	98.9752	-3.08574	-0.0285937	0.333333	-0.219565	2.73739	1	0	0.19	111105	0.833219	0.00147063	301.675	301.004	60.8835	-0.14011	3.91246	39.5297	19.6977	28.1891	3.83688	0.0724442
	15	11:22:53	280	0	2.82877	0.0739047	561.823	1.46233	1.93442	1.94973	28.5214	6	1.42	1	2.84	27.8543	28.5214	27.5313	648.466	643.941	18.1029	19.8231	47.6182	52.1431	499.943	319.965	416.084	98.9751	-3.08574	-0.0285937	0.333333	-0.219565	2.73739	1	0	0.19	111105	0.833239	0.00146233	301.671	301.004	60.7934	-0.136311	3.91173	39.5224	19.6992	28.1878	3.83659	0.0720303
	16	11:22:53	280.5	0	2.82206	0.0734887	561.612	1.45442	1.94034	1.94989	28.5179	6	1.42	1	2.84	27.8553	28.5179	27.5327	648.437	643.926	18.1027	19.8136	47.6147	52.1148	499.947	319.547	416.313	98.9749	-3.08574	-0.0285937	0.333333	-0.219565	2.73739	1	0	0.19	111105	0.833244	0.00145442	301.668	301.005	60.7139	-0.132511	3.91094	39.5145	19.7009	28.1866	3.83632	0.0716351
	17	11:22:54	281.5	0	2.87909	0.0728268	559.769	1.44184	1.99681	1.95019	28.513	6	1.42	1	2.84	27.8581	28.513	27.535	648.464	643.894	18.1029	19.799	47.6076	52.0681	499.955	318.675	417.592	98.9753	-3.08574	-0.0285937	0.333333	-0.219565	2.73739	1	0	0.19	111105	0.833258	0.00144184	301.663	301.008	60.5482	-0.126842	3.90981	39.5029	19.7039	28.1855	3.83608	0.071006
	28	11:26:52	519	0	2.93506	0.047627	555.128	1.04742	2.80217	2.14606	29.2039	6	1.42	1	2.84	28.1544	29.2039	27.8181	681.51	677.137	18.2018	19.4343	47.045	50.2308	499.958	435.459	306.41	98.9694	-3.08574	-0.0285937	0.666667	-0.219565	2.73739	1	0	0.19	111105	0.833263	0.00104742	302.354	301.304	82.7372	0.283994	4.06946	41.1184	21.684	28.6791	3.9477	0.0468414
	29	11:26:53	520	0	2.92385	0.0471617	554.742	1.03691	2.81978	2.14515	29.1958	6	1.42	1	2.84	28.1591	29.1958	27.8218	681.678	677.326	18.2042	19.4244	47.0383	50.1914	499.941	435.263	304.244	98.969	-3.08574	-0.0285937	0.666667	-0.219565	2.73739	1	0	0.19	111105	0.833235	0.00103691	302.346	301.309	82.7	0.290797	4.06757	41.0994	21.675	28.6774	3.94732	0.0463913
	30	11:26:53	520	0	2.92385	0.0471617	554.742	1.03691	2.81978	2.14515	29.1958	6	1.42	1	2.84	28.1591	29.1958	27.8218	681.678	677.326	18.2042	19.4244	47.0383	50.1914	499.941	435.263	304.244	98.969	-3.08574	-0.0285937	0.666667	-0.219565	2.73739	1	0	0.19	111105	0.833235	0.00103691	302.346	301.309	82.7	0.290797	4.06757	41.0994	21.675	28.6774	3.94732	0.0463913
	31	11:26:53	520.5	0	2.93656	0.0469504	553.956	1.03212	2.84516	2.14472	29.1921	6	1.42	1	2.84	28.1614	29.1921	27.8243	681.771	677.408	18.2053	19.4199	47.0346	50.1728	499.932	435.175	303.212	98.969	-3.08574	-0.0285937	0.666667	-0.219565	2.73739	1	0	0.19	111105	0.833221	0.00103212	302.342	301.311	82.6833	0.293943	4.06669	41.0905	21.6706	28.6768	3.94716	0.0461868
	32	11:26:54	521	0	2.94646	0.0466779	553.143	1.02606	2.87162	2.14438	29.1883	6	1.42	1	2.84	28.1643	29.1883	27.8267	681.878	677.508	18.2069	19.4145	47.0311	50.1503	499.932	435.047	302.283	98.9689	-3.08574	-0.0285937	0.666667	-0.219565	2.73739	1	0	0.19	111105	0.83322	0.00102606	302.338	301.314	82.6588	0.29773	4.06581	41.0816	21.6672	28.6763	3.94705	0.0459231
600-1	15	09:43:25	356.5	0	5.15769	0.0397149	197.804	0.43047	11.9815	1.07451	25.4802	6	1.42	1	2.84	25.0983	25.4802	24.9463	419.847	413.445	21.3586	21.8638	67.1148	68.7024	500.017	396.645	441.256	100.501	-1.15163	0.0821147	0.333333	-0.219565	2.73739	1	0	0.19	111105	0.833361	0.00043047	298.63	298.248	75.3626	0.615693	3.27186	32.5554	10.6915	25.2892	3.23492	0.0391672
	16	09:43:25	356.5	0	5.15769	0.0397149	197.804	0.43047	11.9815	1.07451	25.4802	6	1.42	1	2.84	25.0983	25.4802	24.9463	419.847	413.445	21.3586	21.8638	67.1148	68.7024	500.017	396.645	441.256	100.501	-1.15163	0.0821147	0.333333	-0.219565	2.73739	1	0	0.19	111105	0.833361	0.00043047	298.63	298.248	75.3626	0.615693	3.27186	32.5554	10.6915	25.2892	3.23492	0.0391672
600-2	18	10:01:39	632.5	0	4.95163	0.0233762	109.711	0.42984	11.5197	1.81016	27.8345	6	1.42	1	2.84	27.6589	27.8345	27.4935	465.627	459.448	18.881	19.3868	51.0051	52.3715	500.009	182.149	234.589	100.492	-2.01457	0.234943	0.666667	-0.219565	2.73739	1	0	0.19	111105	0.833348	0.00042984	300.985	300.809	34.6083	0.16038	3.75839	37.3997	18.0129	27.7467	3.73916	0.0231854
	19	10:01:40	632.5	0	4.95163	0.0233762	109.711	0.42984	11.5197	1.81016	27.8345	6	1.42	1	2.84	27.6589	27.8345	27.4935	465.627	459.448	18.881	19.3868	51.0051	52.3715	500.009	182.149	234.589	100.492	-2.01457	0.234943	0.666667	-0.219565	2.73739	1	0	0.19	111105	0.833348	0.00042984	300.985	300.809	34.6083	0.16038	3.75839	37.3997	18.0129	27.7467	3.73916	0.0231854
600-3	1	13:06:20	163	0	5.89414	0.0244162	168.352	0.644687	9.14264	2.54316	31.1402	6	1.42	1	2.84	30.0159	31.1402	29.8053	580.734	573.218	19.5354	20.2932	45.2484	47.0038	500.033	254.969	370.384	98.7721	-5.73244	-0.044369	0.666667	-0.219565	2.73739	1	0	0.19	111105	0.833388	0.000644687	304.29	303.166	48.4442	0.0756388	4.54757	46.041	25.7477	30.5781	4.40397	0.0242081
	2	13:06:21	163.5	0	5.85004	0.0245936	174.4	0.643172	9.09561	2.51935	31.0475	6	1.42	1	2.84	30.0167	31.0475	29.8068	581.038	573.576	19.5355	20.2917	45.2468	46.9981	500.002	254.991	370.578	98.772	-5.73244	-0.044369	0.666667	-0.219565	2.73739	1	0	0.19	111105	0.833337	0.000643172	304.197	303.167	48.4482	0.0898054	4.5236	45.7984	25.5067	30.5321	4.3924	0.0243825
	3	13:06:21	164	0	5.86389	0.0246892	175.404	0.640346	9.15739	2.49893	30.9673	6	1.42	1	2.84	30.0169	30.9673	29.8073	581.387	573.91	19.5369	20.2897	45.2493	46.9929	500.001	255.113	370.748	98.7718	-5.73244	-0.044369	0.666667	-0.219565	2.73739	1	0	0.19	111105	0.833335	0.000640346	304.117	303.167	48.4714	0.103	4.50298	45.5897	25.3	30.4921	4.38237	0.0244764
	4	13:06:22	165	0	5.8821	0.0248468	177.498	0.634541	9.26985	2.4612	30.8181	6	1.42	1	2.84	30.019	30.8181	29.8109	582.089	574.593	19.539	20.285	45.2487	46.9763	500	255.363	370.943	98.7719	-5.73244	-0.044369	0.666667	-0.219565	2.73739	1	0	0.19	111105	0.833334	0.000634541	303.968	303.169	48.5189	0.128135	4.46479	45.203	24.9181	30.4185	4.36395	0.0246313
	22	10:16:03	596.5	0	3.79597	0.0848474	423.866	1.09398	3.46985	1.29354	27.6966	6	1.42	1	2.84	28.3203	27.6966	28.2089	512.349	507.128	22.9457	24.2268	59.6426	62.9725	499.961	281.418	349.61	100.496	-2.56682	0.289485	0.666667	-0.219565	2.73739	1	0	0.19	111105	0.833269	0.00109398	300.847	301.47	53.4693	0.148317	3.72824	37.0984	12.8716	28.0085	3.79672	0.0823861
	23	10:16:04	596.5	0	3.79597	0.0848474	423.866	1.09398	3.46985	1.29354	27.6966	6	1.42	1	2.84	28.3203	27.6966	28.2089	512.349	507.128	22.9457	24.2268	59.6426	62.9725	499.961	281.418	349.61	100.496	-2.56682	0.289485	0.666667	-0.219565	2.73739	1	0	0.19	111105	0.833269	0.00109398	300.847	301.47	53.4693	0.148317	3.72824	37.0984	12.8716	28.0085	3.79672	0.0823861
	24	10:16:04	596.5	0	3.79597	0.0848474	423.866	1.09398	3.46985	1.29354	27.6966	6	1.42	1	2.84	28.3203	27.6966	28.2089	512.349	507.128	22.9457	24.2268	59.6426	62.9725	499.961	281.418	349.61	100.496	-2.56682	0.289485	0.666667	-0.219565	2.73739	1	0	0.19	111105	0.833269	0.00109398	300.847	301.47	53.4693	0.148317	3.72824	37.0984	12.8716	28.0085	3.79672	0.0823861
600-4	6	12:00:38	277.5	0	4.99873	0.0376893	547.116	1.22451	4.08223	3.13275	33.574	6	1.42	1	2.84	33.6884	33.574	33.5906	804.24	797.07	19.6586	21.0969	36.9938	39.7006	500.014	191.545	274.105	98.8113	-5.73244	-0.044369	0.333333	-0.219565	2.73739	1	0	0.19	111105	0.833357	0.00122451	306.724	306.838	36.3935	-0.189465	5.21736	52.8013	31.7044	33.6312	5.23408	0.0371956
	7	12:00:39	278	0	4.96933	0.0374327	547.143	1.21648	4.085	3.1333	33.5723	6	1.42	1	2.84	33.69	33.5723	33.5914	804.421	797.294	19.6572	21.086	36.9881	39.6767	500.043	189.637	270.785	98.8116	-5.73244	-0.044369	0.333333	-0.219565	2.73739	1	0	0.19	111105	0.833404	0.00121648	306.722	306.84	36.031	-0.189079	5.21685	52.796	31.7099	33.6311	5.23405	0.0369457
	15	10:29:35	804.5	0	7.30892	0.033195	120.781	0.586715	12.4574	1.74289	28.4855	6	1.42	1	2.84	28.0959	28.4855	27.9491	494.363	485.252	20.8102	21.4991	54.8064	56.6205	500.063	236.547	230.394	100.502	-1.86388	0.227813	0.666667	-0.219565	2.73739	1	0	0.19	111105	0.833438	0.000586715	301.636	301.246	44.944	0.170616	3.90359	38.841	17.3419	28.2907	3.85963	0.0328115
	16	10:29:35	805	0	7.31764	0.0332266	121.201	0.586624	12.4741	1.74102	28.4729	6	1.42	1	2.84	28.0964	28.4729	27.9504	494.886	485.764	20.8004	21.4891	54.7787	56.5925	500.077	236.723	230.636	100.502	-1.86388	0.227813	0.666667	-0.219565	2.73739	1	0	0.19	111105	0.833462	0.000586624	301.623	301.246	44.9773	0.172904	3.90071	38.8124	17.3232	28.2846	3.85827	0.0328424
	17	10:29:35	805	0	7.31764	0.0332266	121.201	0.586624	12.4741	1.74102	28.4729	6	1.42	1	2.84	28.0964	28.4729	27.9504	494.886	485.764	20.8004	21.4891	54.7787	56.5925	500.077	236.723	230.636	100.502	-1.86388	0.227813	0.666667	-0.219565	2.73739	1	0	0.19	111105	0.833462	0.000586624	301.623	301.246	44.9773	0.172904	3.90071	38.8124	17.3232	28.2846	3.85827	0.0328424
	18	10:29:36	805.5	0	7.32831	0.0332737	121.689	0.586705	12.4906	1.73886	28.459	6	1.42	1	2.84	28.0973	28.459	27.9511	495.411	486.275	20.7903	21.4792	54.7496	56.5637	500.039	236.936	231.072	100.502	-1.86388	0.227813	0.666667	-0.219565	2.73739	1	0	0.19	111105	0.833399	0.000586705	301.609	301.247	45.0178	0.175396	3.89757	38.781	17.3018	28.2781	3.8568	0.0328884
600-5	17	10:56:26	921.5	0	3.67281	0.0527406	310.296	0.715725	5.1316	1.34836	27.0691	6	1.42	1	2.84	27.2542	27.0691	27.093	436.451	431.673	21.5096	22.3492	59.4832	61.8052	500.005	313.839	423.95	100.466	-1.80974	0.265632	0.666667	-0.219565	2.73739	1	0	0.19	111105	0.833341	0.000715725	300.219	300.404	59.6293	0.35708	3.5937	35.7702	13.421	27.1616	3.61327	0.0517791
	18	10:56:27	922	0	3.66961	0.0526586	310.312	0.71435	5.13698	1.34781	27.0721	6	1.42	1	2.84	27.255	27.0721	27.0935	436.536	431.762	21.523	22.361	59.5173	61.8346	500.041	313.436	424.372	100.466	-1.80974	0.265632	0.666667	-0.219565	2.73739	1	0	0.19	111105	0.833401	0.00071435	300.222	300.405	59.5528	0.356594	3.59434	35.7765	13.4156	27.1636	3.61369	0.0517
	19	10:56:27	922	0	3.66961	0.0526586	310.312	0.71435	5.13698	1.34781	27.0721	6	1.42	1	2.84	27.255	27.0721	27.0935	436.536	431.762	21.523	22.361	59.5173	61.8346	500.041	313.436	424.372	100.466	-1.80974	0.265632	0.666667	-0.219565	2.73739	1	0	0.19	111105	0.833401	0.00071435	300.222	300.405	59.5528	0.356594	3.59434	35.7765	13.4156	27.1636	3.61369	0.0517
800-1	14	11:34:11	674.5	0	4.38152	0.0127676	220.413	0.342652	12.7871	2.58155	30.4345	6	1.42	1	2.84	30.0731	30.4345	29.9201	799.041	793.457	17.6702	18.0739	40.8215	41.7542	500.003	311.584	442.387	98.8387	-4.14852	0.344797	0.666667	-0.219565	2.73739	1	0	0.19	111105	0.833339	0.000342652	303.585	303.223	59.2009	0.467279	4.36795	44.1928	26.1189	30.2538	4.32296	0.0127105
	15	11:34:12	675	0	4.42566	0.0127404	214.253	0.342001	12.9405	2.58213	30.4365	6	1.42	1	2.84	30.0742	30.4365	29.9219	799.553	793.916	17.6699	18.0729	40.8184	41.7493	499.986	311.55	442.446	98.8387	-4.14852	0.344797	0.666667	-0.219565	2.73739	1	0	0.19	111105	0.833309	0.000342001	303.586	303.224	59.1945	0.46742	4.36843	44.1976	26.1247	30.2553	4.32333	0.0126835
800-2	4	11:43:15	536.5	0	6.27989	0.0213506	234.135	0.608778	10.3156	2.74803	31.1828	6	1.42	1	2.84	30.9664	31.1828	30.8209	737.977	729.909	17.6007	18.3178	38.6363	40.2105	500.027	329.174	420.476	98.8423	-4.62075	0.354881	0.666667	-0.219565	2.73739	1	0	0.19	111105	0.833378	0.000608778	304.333	304.116	62.5431	0.38845	4.5586	46.12	27.8022	31.0746	4.53059	0.0211912
	5	11:43:15	537	0	6.24769	0.0212926	235.689	0.606974	10.2932	2.74729	31.1814	6	1.42	1	2.84	30.968	31.1814	30.8227	738.376	730.347	17.6069	18.3219	38.6463	40.2157	500.016	329.341	420.175	98.8422	-4.62075	0.354881	0.666667	-0.219565	2.73739	1	0	0.19	111105	0.83336	0.000606974	304.331	304.118	62.5748	0.390178	4.55826	46.1165	27.7947	31.0747	4.53063	0.0211342
	6	11:43:16	537.5	0	6.20038	0.0212576	238.851	0.605747	10.2359	2.74622	31.1789	6	1.42	1	2.84	30.9701	31.1789	30.8245	738.745	730.774	17.6124	18.326	38.6538	40.2198	500.025	330.462	419.992	98.8421	-4.62075	0.354881	0.666667	-0.219565	2.73739	1	0	0.19	111105	0.833376	0.000605747	304.329	304.12	62.7878	0.393979	4.5576	46.1099	27.784	31.0745	4.53058	0.0210996
800-3	11	10:06:28	602	0	7.34876	0.0399706	329.362	0.729601	10.0723	1.79365	27.2491	6	1.42	1	2.84	27.208	27.2491	27.0709	650.802	641.42	17.5899	18.4495	48.3719	50.7357	499.897	154.854	287.49	99.6352	-1.76436	0.164561	0.333333	-0.219565	2.73739	1	0	0.19	111105	0.833162	0.000729601	300.399	300.358	29.4223	-0.0381883	3.63187	36.4517	18.0022	27.2286	3.62749	0.0394159
	11	10:06:28	602	0	7.34876	0.0399706	329.362	0.729601	10.0723	1.79365	27.2491	6	1.42	1	2.84	27.208	27.2491	27.0709	650.802	641.42	17.5899	18.4495	48.3719	50.7357	499.897	154.854	287.49	99.6352	-1.76436	0.164561	0.333333	-0.219565	2.73739	1	0	0.19	111105	0.833162	0.000729601	300.399	300.358	29.4223	-0.0381883	3.63187	36.4517	18.0022	27.2286	3.62749	0.0394159
800-4	18	10:27:52	1022	0	7.7341	0.0492475	532.757	0.922049	8.38795	1.84704	26.891	6	1.42	1	2.84	27.0031	26.891	26.8614	818.319	808.144	16.0732	17.1607	44.7214	47.7474	499.961	310.734	375.299	99.6034	-0.785904	0.467158	0.666667	-0.219565	2.73739	1	0	0.19	111105	0.833268	0.000922049	300.041	300.153	59.0394	0.232583	3.55631	35.7047	18.5439	26.9471	3.56804	0.0484081
	19	10:27:53	1022.5	0	7.75009	0.049725	535.274	0.930492	8.32902	1.84634	26.8916	6	1.42	1	2.84	27.0038	26.8916	26.8624	819.014	808.81	16.0715	17.169	44.7149	47.7683	499.984	309.089	374.723	99.6031	-0.785904	0.467158	0.666667	-0.219565	2.73739	1	0	0.19	111105	0.833306	0.000930492	300.042	300.154	58.727	0.224505	3.55643	35.706	18.537	26.9477	3.56818	0.0488694
800-5	5	12:35:55	497	0	6.88977	0.0405798	567.67	1.21611	5.66539	2.8996	32.3484	6	1.42	1	2.84	32.4599	32.3484	32.3259	887.273	877.724	18.511	19.9413	37.323	40.2068	499.983	431.048	471.869	98.8124	-7.08059	0.404331	0.666667	-0.219565	2.73739	1	0	0.19	111105	0.833304	0.00121611	305.498	305.61	81.8991	0.347568	4.87006	49.2859	29.3445	32.4041	4.8854	0.0400081
	6	12:35:56	497.5	0	6.81291	0.0405707	570.913	1.21654	5.60022	2.90126	32.352	6	1.42	1	2.84	32.4604	32.352	32.3265	887.524	878.067	18.5039	19.9348	37.3075	40.1923	499.977	430.827	471.691	98.8123	-7.08059	0.404331	0.666667	-0.219565	2.73739	1	0	0.19	111105	0.833296	0.00121654	305.502	305.61	81.8571	0.346405	4.87106	49.2961	29.3613	32.4062	4.88598	0.0399993
[truncated: 12 more columns]

## Sheet: Q. variabilis
Q. variabilis	Obs	HHMMSS	FTime	EBal?	Photo	Cond	Ci	Trmmol	WUEge	VpdL	CTleaf	Area	BLC_1	StmRat	BLCond	Tair	Tleaf	TBlk	CO2R	CO2S	H2OR	H2OS	RH_R	RH_S	Flow	PARi	PARo	Press	CsMch	HsMch	StableF	BLCslope	BLCoffst	f_parin	f_parout	alphaK	Status	fda	Trans	Tair_K	Twall_K	R(W/m2)	Tl-Ta	SVTleaf	h2o_i	h20diff	CTair	SVTair	CndTotal
	in	in	in	in	out	out	out	out		out	out	in	out	in	out	in	in	in	in	in	in	in	in	in	in	in	in	in	in	in	in	in	in	in	in	in	in	out	out	out	out	out	out	out	out	out	out	out	out
400-1	19	10:14:43	778.5	0	7.44101	0.0844984	344.081	1.19761	6.21323	1.43368	23.8731	6	1.42	1	2.84	23.9398	23.8731	23.8291	508.01	498.364	13.8956	15.3108	46.7915	51.5571	499.964	327.075	322.85	100.488	0.930098	0.613738	0.666667	-0.219565	2.73739	1	0	0.19	111105	0.833273	0.00119761	297.023	297.09	62.1443	0.11963	2.97222	29.578	14.2672	23.9064	2.97818	0.082057
	20	10:14:43	778.5	0	7.44101	0.0844984	344.081	1.19761	6.21323	1.43368	23.8731	6	1.42	1	2.84	23.9398	23.8731	23.8291	508.01	498.364	13.8956	15.3108	46.7915	51.5571	499.964	327.075	322.85	100.488	0.930098	0.613738	0.666667	-0.219565	2.73739	1	0	0.19	111105	0.833273	0.00119761	297.023	297.09	62.1443	0.11963	2.97222	29.578	14.2672	23.9064	2.97818	0.082057
400-2	1	10:17:43	172	0	7.03857	0.299724	499.569	2.79718	2.51631	1.01185	23.5639	6	1.42	1	2.84	24.4024	23.5639	24.2788	559.365	549.075	15.6708	18.964	51.3227	62.108	499.968	148.536	208.532	100.483	0.930098	0.613738	0.666667	-0.219565	2.73739	1	0	0.19	111105	0.833279	0.00279718	296.714	297.552	28.2218	-1.01674	2.91741	29.0338	10.0698	23.9832	2.99195	0.271112
	2	10:17:43	172	0	7.03857	0.299724	499.569	2.79718	2.51631	1.01185	23.5639	6	1.42	1	2.84	24.4024	23.5639	24.2788	559.365	549.075	15.6708	18.964	51.3227	62.108	499.968	148.536	208.532	100.483	0.930098	0.613738	0.666667	-0.219565	2.73739	1	0	0.19	111105	0.833279	0.00279718	296.714	297.552	28.2218	-1.01674	2.91741	29.0338	10.0698	23.9832	2.99195	0.271112
	3	10:17:43	172	0	7.03857	0.299724	499.569	2.79718	2.51631	1.01185	23.5639	6	1.42	1	2.84	24.4024	23.5639	24.2788	559.365	549.075	15.6708	18.964	51.3227	62.108	499.968	148.536	208.532	100.483	0.930098	0.613738	0.666667	-0.219565	2.73739	1	0	0.19	111105	0.833279	0.00279718	296.714	297.552	28.2218	-1.01674	2.91741	29.0338	10.0698	23.9832	2.99195	0.271112
400-3	4	11:26:45	1506.5	0	7.67201	0.163641	352.89	2.19458	3.49589	1.38742	25.6031	6	1.42	1	2.84	26.8216	25.6031	26.8048	450.904	440.537	16.4206	19.0042	46.5567	53.8817	499.979	237.526	199.807	100.42	1.5634	0.229764	0.666667	-0.219565	2.73739	1	0	0.19	111105	0.833298	0.00219458	298.753	299.972	45.1299	-0.444663	3.29583	32.8204	13.8162	26.2124	3.4169	0.154725
	5	11:26:46	1507	0	7.72084	0.163874	352.588	2.19746	3.51354	1.38737	25.6046	6	1.42	1	2.84	26.8232	25.6046	26.8058	451.053	440.626	16.4206	19.0076	46.552	53.8863	499.958	238.038	200.669	100.42	1.5634	0.229764	0.666667	-0.219565	2.73739	1	0	0.19	111105	0.833263	0.00219746	298.755	299.973	45.2272	-0.444987	3.29611	32.8233	13.8157	26.2139	3.4172	0.154934
400-4	15	12:24:45	2478.5	0	10.91	0.0816846	206.338	1.18258	9.2256	1.45691	25.3302	6	1.42	1	2.84	25.6225	25.3302	25.5547	447.238	432.886	16.4055	17.7994	49.8858	54.1244	499.977	323.662	378.12	100.335	1.5634	0.229764	0.666667	-0.219565	2.73739	1	0	0.19	111105	0.833295	0.00118258	298.48	298.773	61.4958	0.150376	3.24281	32.32	14.5205	25.4763	3.27111	0.0794009
	16	12:24:46	2478.5	0	10.9138	0.0816846	206.262	1.18258	9.22882	1.45691	25.3302	6	1.42	1	2.84	25.6225	25.3302	25.5547	447.238	432.886	16.4055	17.7994	49.8858	54.1244	499.977	323.662	378.12	100.335	1.5634	0.229764	0.666667	-0.219565	2.73739	1	0	0.19	111105	0.833295	0.00118258	298.48	298.773	61.4958	0.150376	3.24281	32.32	14.5205	25.4763	3.27111	0.0794009
	17	12:24:46	2479	0	10.9138	0.0816807	206.578	1.18287	9.22654	1.45734	25.3322	6	1.42	1	2.84	25.6241	25.3322	25.5555	447.596	433.221	16.4048	17.7991	49.8791	54.1184	499.96	323.812	378.082	100.335	1.5634	0.229764	0.666667	-0.219565	2.73739	1	0	0.19	111105	0.833267	0.00118287	298.482	298.774	61.5244	0.1505	3.2432	32.3238	14.5247	25.4781	3.27146	0.0793972
400-5	9	10:56:50	288.5	0	6.23563	0.190066	357.55	1.59175	3.91746	0.873892	24.4729	6	1.42	1	2.84	24.7407	24.4729	24.6374	426.829	418.548	20.1059	21.9739	64.506	70.499	500.042	166.229	230.381	100.448	0.930098	0.613738	0.666667	-0.219565	2.73739	1	0	0.19	111105	0.833404	0.00159175	297.623	297.891	31.5835	-0.421656	3.08112	30.6739	8.69998	24.6068	3.1059	0.178144
	10	10:56:51	288.5	0	6.23563	0.190066	357.55	1.59175	3.91746	0.873892	24.4729	6	1.42	1	2.84	24.7407	24.4729	24.6374	426.829	418.548	20.1059	21.9739	64.506	70.499	500.042	166.229	230.381	100.448	0.930098	0.613738	0.666667	-0.219565	2.73739	1	0	0.19	111105	0.833404	0.00159175	297.623	297.891	31.5835	-0.421656	3.08112	30.6739	8.69998	24.6068	3.1059	0.178144
500-1	12	10:21:25	305.5	0	2.57838	0.0239411	305.668	0.143937	17.9132	0.60723	17.036	6	1.42	1	2.84	16.9119	17.036	16.7004	486.225	483.048	13.0098	13.1802	68.4903	69.3874	500.105	110.319	128.205	101.802	1.27586	0.617515	0.666667	-0.219565	2.73739	1	0	0.19	111105	0.833508	0.000143937	290.186	290.062	20.9605	0.159338	1.949	19.145	5.96483	16.9739	1.94135	0.0237409
	13	10:21:25	305.5	0	2.57838	0.0239411	305.668	0.143937	17.9132	0.60723	17.036	6	1.42	1	2.84	16.9119	17.036	16.7004	486.225	483.048	13.0098	13.1802	68.4903	69.3874	500.105	110.319	128.205	101.802	1.27586	0.617515	0.666667	-0.219565	2.73739	1	0	0.19	111105	0.833508	0.000143937	290.186	290.062	20.9605	0.159338	1.949	19.145	5.96483	16.9739	1.94135	0.0237409
500-2	7	10:38:31	99	0	3.19736	0.264783	440.604	2.70092	1.1838	1.11061	22.6264	6	1.42	1	2.84	23.6396	22.6264	23.5466	474.844	469.486	12.9814	16.1699	45.0883	56.1628	500.037	28.7887	92.336	101.793	1.27586	0.617515	0.666667	-0.219565	2.73739	1	0	0.19	111105	0.833395	0.00270092	295.776	296.79	5.46984	-1.21569	2.75659	27.0803	10.9104	23.133	2.8425	0.242202
	8	10:38:31	99	0	3.19736	0.264783	440.604	2.70092	1.1838	1.11061	22.6264	6	1.42	1	2.84	23.6396	22.6264	23.5466	474.844	469.486	12.9814	16.1699	45.0883	56.1628	500.037	28.7887	92.336	101.793	1.27586	0.617515	0.666667	-0.219565	2.73739	1	0	0.19	111105	0.833395	0.00270092	295.776	296.79	5.46984	-1.21569	2.75659	27.0803	10.9104	23.133	2.8425	0.242202
	9	10:38:32	99.5	0	3.19879	0.2649	440.483	2.70283	1.1835	1.11094	22.6263	6	1.42	1	2.84	23.6408	22.6263	23.5486	474.728	469.367	12.9755	16.1663	45.0643	56.146	500.025	29.0613	92.3946	101.793	1.27586	0.617515	0.666667	-0.219565	2.73739	1	0	0.19	111105	0.833375	0.00270283	295.776	296.791	5.52164	-1.21587	2.75656	27.08	10.9137	23.1335	2.84259	0.242299
500-3	11	10:32:05	266.5	0	3.17903	0.266537	423.9	2.05351	1.5481	0.839919	21.331	6	1.42	1	2.84	22.0573	21.331	21.9809	455.262	450.339	14.3494	16.7719	54.854	64.1145	500.084	81.8186	107.004	101.792	1.27586	0.617515	0.666667	-0.219565	2.73739	1	0	0.19	111105	0.833474	0.00205351	294.481	295.207	15.5455	-0.797594	2.54716	25.0232	8.25134	21.6942	2.60442	0.243669
	12	10:32:06	266.5	0	3.17903	0.266537	423.9	2.05351	1.5481	0.839919	21.331	6	1.42	1	2.84	22.0573	21.331	21.9809	455.262	450.339	14.3494	16.7719	54.854	64.1145	500.084	81.8186	107.004	101.792	1.27586	0.617515	0.666667	-0.219565	2.73739	1	0	0.19	111105	0.833474	0.00205351	294.481	295.207	15.5455	-0.797594	2.54716	25.0232	8.25134	21.6942	2.60442	0.243669
	13	10:32:06	267	0	3.18612	0.266173	423.884	2.05142	1.55313	0.840116	21.3304	6	1.42	1	2.84	22.0602	21.3304	21.984	455.328	450.396	14.3488	16.769	54.8422	64.0922	500.058	81.7674	106.926	101.792	1.27586	0.617515	0.666667	-0.219565	2.73739	1	0	0.19	111105	0.83343	0.00205142	294.48	295.21	15.5358	-0.79615	2.54706	25.0222	8.25328	21.6953	2.6046	0.243364
500-4	7	10:44:01	123	0	4.42896	0.0603867	330.736	0.933068	4.74666	1.57131	24.0481	6	1.42	1	2.84	24.4488	24.0481	24.3758	466.007	460.177	12.967	14.0709	42.902	46.5542	500.025	163.551	198.225	101.794	1.27586	0.617515	0.666667	-0.219565	2.73739	1	0	0.19	111105	0.833375	0.000933068	297.198	297.599	31.0746	-0.0656154	3.00364	29.5072	15.4363	24.2485	3.03997	0.0591294
	8	10:44:02	123	0	4.42896	0.0603867	330.736	0.933068	4.74666	1.57131	24.0481	6	1.42	1	2.84	24.4488	24.0481	24.3758	466.007	460.177	12.967	14.0709	42.902	46.5542	500.025	163.551	198.225	101.794	1.27586	0.617515	0.666667	-0.219565	2.73739	1	0	0.19	111105	0.833375	0.000933068	297.198	297.599	31.0746	-0.0656154	3.00364	29.5072	15.4363	24.2485	3.03997	0.0591294
	9	10:44:02	123.5	0	4.42429	0.0604526	330.913	0.933624	4.73884	1.57057	24.0459	6	1.42	1	2.84	24.4505	24.0459	24.3771	465.92	460.096	12.9698	14.0743	42.9068	46.5609	500.018	163.492	198.288	101.793	1.27586	0.617515	0.666667	-0.219565	2.73739	1	0	0.19	111105	0.833364	0.000933624	297.196	297.6	31.0634	-0.06552	3.00324	29.5033	15.429	24.2482	3.03991	0.0591927
500-5	11	10:26:03	153	0	5.36437	0.166299	421.788	0.993341	5.40033	0.631824	18.8868	6	1.42	1	2.84	19.0062	18.8868	18.8573	487.525	480.515	14.1294	15.3031	65.2006	70.6167	500.031	221.208	170.376	101.798	1.27586	0.617515	0.666667	-0.219565	2.73739	1	0	0.19	111105	0.833386	0.000993341	292.037	292.156	42.0295	-0.00590706	2.18965	21.5097	6.20662	18.9465	2.19783	0.157099
	12	10:26:03	153	0	5.36437	0.166299	421.788	0.993341	5.40033	0.631824	18.8868	6	1.42	1	2.84	19.0062	18.8868	18.8573	487.525	480.515	14.1294	15.3031	65.2006	70.6167	500.031	221.208	170.376	101.798	1.27586	0.617515	0.666667	-0.219565	2.73739	1	0	0.19	111105	0.833386	0.000993341	292.037	292.156	42.0295	-0.00590706	2.18965	21.5097	6.20662	18.9465	2.19783	0.157099
	13	10:26:04	153	0	5.36437	0.166299	421.788	0.993341	5.40033	0.631824	18.8868	6	1.42	1	2.84	19.0062	18.8868	18.8573	487.525	480.515	14.1294	15.3031	65.2006	70.6167	500.031	221.208	170.376	101.798	1.27586	0.617515	0.666667	-0.219565	2.73739	1	0	0.19	111105	0.833386	0.000993341	292.037	292.156	42.0295	-0.00590706	2.18965	21.5097	6.20662	18.9465	2.19783	0.157099
600-1	10	09:50:48	741	0	5.99076	0.0409747	238.567	0.849928	7.04855	2.05672	27.1781	6	1.42	1	2.84	27.1823	27.1781	27.0831	495.272	487.586	14.5449	15.5489	40.3387	43.1233	500.005	175.22	200.845	100.332	-2.33027	0.669287	0.666667	-0.219565	2.73739	1	0	0.19	111105	0.833342	0.000849928	300.328	300.332	33.2919	-0.0489178	3.61677	36.0481	20.4992	27.1802	3.61721	0.0403919
	11	09:50:49	741	0	5.99076	0.0409747	238.567	0.849928	7.04855	2.05672	27.1781	6	1.42	1	2.84	27.1823	27.1781	27.0831	495.272	487.586	14.5449	15.5489	40.3387	43.1233	500.005	175.22	200.845	100.332	-2.33027	0.669287	0.666667	-0.219565	2.73739	1	0	0.19	111105	0.833342	0.000849928	300.328	300.332	33.2919	-0.0489178	3.61677	36.0481	20.4992	27.1802	3.61721	0.0403919
	12	09:50:49	741.5	0	5.99548	0.0408764	238.05	0.848104	7.06927	2.05717	27.1789	6	1.42	1	2.84	27.1839	27.1789	27.0847	495.507	487.817	14.5442	15.5461	40.333	43.1113	500.012	174.87	199.865	100.332	-2.33027	0.669287	0.666667	-0.219565	2.73739	1	0	0.19	111105	0.833353	0.000848104	300.329	300.334	33.2253	-0.0486363	3.61693	36.0498	20.5037	27.1814	3.61746	0.0402964
600-2	10	10:09:47	885	0	5.75284	0.0646505	437.374	1.49316	3.85278	2.30352	28.7485	6	1.42	1	2.84	29.1388	28.7485	29.0703	610.087	602.104	14.7842	16.5465	36.5863	40.9475	499.955	302.384	243.298	100.329	-3.47651	0.691392	0.666667	-0.219565	2.73739	1	0	0.19	111105	0.833258	0.00149316	301.899	302.289	57.4529	-0.044295	3.96361	39.5062	22.9597	28.9437	4.00868	0.0632115
	11	10:09:48	885.5	0	5.72455	0.064473	437.665	1.48926	3.84389	2.30369	28.7477	6	1.42	1	2.84	29.14	28.7477	29.0714	610.024	602.078	14.7853	16.543	36.5865	40.936	499.946	302.753	243.604	100.329	-3.47651	0.691392	0.666667	-0.219565	2.73739	1	0	0.19	111105	0.833244	0.00148926	301.898	302.29	57.5231	-0.0411579	3.96343	39.5043	22.9613	28.9439	4.00873	0.0630419
	12	10:09:49	886.5	0	5.75346	0.064257	436.416	1.48468	3.87522	2.30416	28.7479	6	1.42	1	2.84	29.1424	28.7479	29.0734	609.996	602.019	14.7864	16.5387	36.5843	40.92	499.933	305.016	246.4	100.329	-3.47651	0.691392	0.666667	-0.219565	2.73739	1	0	0.19	111105	0.833221	0.00148468	301.898	302.292	57.953	-0.0334091	3.96348	39.5047	22.966	28.9452	4.00903	0.0628353
600-3	1	10:11:14	72.5	0	7.81656	0.145281	531.901	2.76642	2.82551	1.95165	28.0317	6	1.42	1	2.84	29.2528	28.0317	29.1894	651.904	640.397	15.1824	18.4411	37.3259	45.3375	499.963	141.384	134.704	100.331	-3.47651	0.691392	0.666667	-0.219565	2.73739	1	0	0.19	111105	0.833271	0.00276642	301.182	302.403	26.8629	-0.951773	3.80186	37.8932	19.4521	28.6423	3.93927	0.138211
	2	10:11:14	72.5	0	7.81656	0.145281	531.901	2.76642	2.82551	1.95165	28.0317	6	1.42	1	2.84	29.2528	28.0317	29.1894	651.904	640.397	15.1824	18.4411	37.3259	45.3375	499.963	141.384	134.704	100.331	-3.47651	0.691392	0.666667	-0.219565	2.73739	1	0	0.19	111105	0.833271	0.00276642	301.182	302.403	26.8629	-0.951773	3.80186	37.8932	19.4521	28.6423	3.93927	0.138211
	3	10:11:15	73.5	0	8.3134	0.145306	526.975	2.76654	3.00498	1.95142	28.0308	6	1.42	1	2.84	29.2546	28.0308	29.1914	653.202	641.097	15.1825	18.4413	37.3223	45.3334	499.965	141.582	135.155	100.331	-3.47651	0.691392	0.666667	-0.219565	2.73739	1	0	0.19	111105	0.833274	0.00276654	301.181	302.405	26.9005	-0.95101	3.80166	37.8911	19.4498	28.6427	3.93936	0.138234
600-4	8	10:22:06	382.5	0	7.68371	0.162882	700.379	2.84992	2.69612	1.80157	28.2488	6	1.42	1	2.84	29.1509	28.2488	29.0342	813.582	801.619	17.0688	20.4192	42.211	50.4965	499.954	118.707	163.147	100.33	-3.47651	0.691392	0.666667	-0.219565	2.73739	1	0	0.19	111105	0.833257	0.00284992	301.399	302.301	22.5543	-1.09022	3.85023	38.3756	17.9564	28.6999	3.95245	0.154047
	9	10:22:10	386	0	8.16136	0.160395	696.707	2.81385	2.90042	1.80484	28.2549	6	1.42	1	2.84	29.1584	28.2549	29.0401	816.648	804.139	17.0926	20.4004	42.2513	50.4276	500.002	117.148	163.355	100.329	-3.47651	0.691392	0.666667	-0.219565	2.73739	1	0	0.19	111105	0.833337	0.00281385	301.405	302.308	22.2581	-1.07474	3.85159	38.3895	17.9892	28.7067	3.95401	0.151821
	10	10:22:11	387	0	7.93263	0.159813	699.531	2.8054	2.82763	1.80564	28.2575	6	1.42	1	2.84	29.1607	28.2575	29.0428	817.151	804.922	17.1003	20.3981	42.2648	50.4157	499.998	117.206	163.661	100.33	-3.47651	0.691392	0.666667	-0.219565	2.73739	1	0	0.19	111105	0.833331	0.0028054	301.407	302.311	22.2692	-1.07024	3.85217	38.3951	17.997	28.7091	3.95457	0.151299
600-5	8	10:50:44	359	0	7.2597	0.069672	427.325	0.847943	8.56154	1.21969	24.6055	6	1.42	1	2.84	24.3186	24.6055	24.1614	617.165	607.835	17.8024	18.8007	58.4981	61.7786	500.026	396.183	469.457	100.313	-2.74147	0.404483	0.666667	-0.219565	2.73739	1	0	0.19	111105	0.833376	0.000847943	297.755	297.469	75.2747	0.410385	3.10565	30.9596	12.1588	24.462	3.07911	0.0680037
	9	10:50:44	359	0	7.2597	0.069672	427.325	0.847943	8.56154	1.21969	24.6055	6	1.42	1	2.84	24.3186	24.6055	24.1614	617.165	607.835	17.8024	18.8007	58.4981	61.7786	500.026	396.183	469.457	100.313	-2.74147	0.404483	0.666667	-0.219565	2.73739	1	0	0.19	111105	0.833376	0.000847943	297.755	297.469	75.2747	0.410385	3.10565	30.9596	12.1588	24.462	3.07911	0.0680037
	10	10:50:47	362.5	0	7.31325	0.0684164	424.238	0.83517	8.7566	1.22282	24.6246	6	1.42	1	2.84	24.3326	24.6246	24.1754	618.482	609.095	17.8215	18.8049	58.5121	61.741	499.947	398.376	470.122	100.314	-2.74147	0.404483	0.666667	-0.219565	2.73739	1	0	0.19	111105	0.833246	0.00083517	297.775	297.483	75.6914	0.421287	3.10921	30.9949	12.19	24.4786	3.08217	0.066807
800-1	21	10:04:30	1464	0	9.94682	0.0362651	150.915	0.619283	16.0618	1.67498	28.7779	6	1.42	1	2.84	28.8487	28.7779	28.7861	617.388	605.002	22.2319	22.958	55.7556	57.5766	499.96	140.344	181.658	99.9825	-2.06746	-0.253385	0.666667	-0.219565	2.73739	1	0	0.19	111105	0.833266	0.000619283	301.928	301.999	26.6654	0.00229205	3.97038	39.7107	16.7527	28.8133	3.97853	0.0358079
	22	10:04:30	1464.5	0	10.2934	0.0360875	134.068	0.616167	16.7056	1.67465	28.7759	6	1.42	1	2.84	28.851	28.7759	28.7881	618.425	605.624	22.2342	22.9567	55.7538	57.5654	499.971	140.918	181.803	99.9827	-2.06746	-0.253385	0.666667	-0.219565	2.73739	1	0	0.19	111105	0.833285	0.000616167	301.926	302.001	26.7744	0.00580336	3.96992	39.7061	16.7494	28.8135	3.97857	0.0356347
800-2	24	10:11:44	420	0	5.10939	0.0345741	408.953	0.60679	8.42037	1.71825	29.3897	6	1.42	1	2.84	29.3887	29.3897	29.2996	669.691	663.076	23.2452	23.9559	56.5035	58.2311	499.978	194.829	187.838	99.9801	-2.06746	-0.253385	0.666667	-0.219565	2.73739	1	0	0.19	111105	0.833297	0.00060679	302.54	302.539	37.0175	0.120654	4.11337	41.1418	17.1859	29.3892	4.11325	0.0341582
	25	10:11:44	420	0	5.10939	0.0345741	408.953	0.60679	8.42037	1.71825	29.3897	6	1.42	1	2.84	29.3887	29.3897	29.2996	669.691	663.076	23.2452	23.9559	56.5035	58.2311	499.978	194.829	187.838	99.9801	-2.06746	-0.253385	0.666667	-0.219565	2.73739	1	0	0.19	111105	0.833297	0.00060679	302.54	302.539	37.0175	0.120654	4.11337	41.1418	17.1859	29.3892	4.11325	0.0341582
800-3	14	10:20:07	298.5	0	7.8003	0.0756947	479.903	1.18835	6.56397	1.56227	28.1214	6	1.42	1	2.84	28.4031	28.1214	28.3091	673.537	663.229	21.2079	22.6019	54.5735	58.1606	499.931	235.306	230.501	99.9697	-2.06746	-0.253385	1	-0.219565	2.73739	1	0	0.19	111105	0.833219	0.00118835	301.271	301.553	44.7082	-0.0515963	3.82177	38.2293	15.6275	28.2622	3.85324	0.0737296
	15	10:20:07	298.5	0	7.8003	0.0756947	479.903	1.18835	6.56397	1.56227	28.1214	6	1.42	1	2.84	28.4031	28.1214	28.3091	673.537	663.229	21.2079	22.6019	54.5735	58.1606	499.931	235.306	230.501	99.9697	-2.06746	-0.253385	1	-0.219565	2.73739	1	0	0.19	111105	0.833219	0.00118835	301.271	301.553	44.7082	-0.0515963	3.82177	38.2293	15.6275	28.2622	3.85324	0.0737296
	16	10:20:08	299	0	7.83384	0.0758978	479.673	1.19189	6.57263	1.56284	28.1237	6	1.42	1	2.84	28.4036	28.1237	28.3103	673.635	663.285	21.2033	22.6014	54.5602	58.1578	499.943	234.074	229.456	99.97	-2.06746	-0.253385	0.666667	-0.219565	2.73739	1	0	0.19	111105	0.833238	0.00119189	301.274	301.554	44.4741	-0.0564521	3.8223	38.2344	15.6331	28.2637	3.85356	0.0739223
800-4	25	11:15:28	435	0	9.78738	0.103887	650.157	2.88146	3.39668	2.77711	31.7746	6	1.42	1	2.84	31.8331	31.7746	31.7609	854.36	839.711	15.9989	19.3898	33.7955	40.9581	499.981	385.069	518.686	99.9178	-1.29518	0.466549	0.333333	-0.219565	2.73739	1	0	0.19	111105	0.833302	0.00288146	304.925	304.983	73.1631	-0.624305	4.7145	47.1838	27.794	31.8038	4.72232	0.100221
	26	11:15:33	439.5	0	10.7855	0.0991199	628.141	2.74303	3.93197	2.76696	31.6764	6	1.42	1	2.84	31.8354	31.6764	31.7642	856.651	840.94	16.0012	19.2296	33.7958	40.6144	499.994	400.299	523.492	99.9173	-1.29518	0.466549	0.333333	-0.219565	2.73739	1	0	0.19	111105	0.833324	0.00274303	304.826	304.985	76.0568	-0.50438	4.68833	46.9221	27.6925	31.7559	4.7095	0.0957771
	27	11:15:33	440	0	10.5651	0.0987696	631.33	2.73087	3.86876	2.76421	31.6609	6	1.42	1	2.84	31.8356	31.6609	31.7649	856.547	841.113	16.0016	19.2157	33.7961	40.5845	499.994	400.884	523.824	99.9176	-1.29518	0.466549	0.333333	-0.219565	2.73739	1	0	0.19	111105	0.833324	0.00273087	304.811	304.986	76.168	-0.494525	4.6842	46.8806	27.6649	31.7483	4.70747	0.09545
800-5	16	11:07:55	1230.5	0	12.5122	0.0619154	348.847	1.81068	6.91021	2.88819	31.7738	6	1.42	1	2.84	32.5333	31.7738	32.7095	719.835	703.293	16.1421	18.2751	32.7765	37.1076	500.024	262.702	330.328	99.9234	-10.6257	0.540619	0.333333	-0.219565	2.73739	1	0	0.19	111105	0.833373	0.00181068	304.924	305.683	49.9134	-0.242051	4.7143	47.1791	28.904	32.1536	4.81675	0.0605943
	17	11:07:55	1230.5	0	12.5122	0.0619154	348.847	1.81068	6.91021	2.88819	31.7738	6	1.42	1	2.84	32.5333	31.7738	32.7095	719.835	703.293	16.1421	18.2751	32.7765	37.1076	500.024	262.702	330.328	99.9234	-10.6257	0.540619	0.333333	-0.219565	2.73739	1	0	0.19	111105	0.833373	0.00181068	304.924	305.683	49.9134	-0.242051	4.7143	47.1791	28.904	32.1536	4.81675	0.0605943
	18	11:07:56	1231.5	0	12.2362	0.0598284	345.207	1.75789	6.96074	2.89971	31.7942	6	1.42	1	2.84	32.5335	31.7942	32.7075	719.605	703.438	16.1434	18.2143	32.7786	36.9836	500.026	263.097	329.091	99.9232	-10.6257	0.540619	0.333333	-0.219565	2.73739	1	0	0.19	111105	0.833376	0.00175789	304.944	305.683	49.9884	-0.216738	4.71974	47.2337	29.0194	32.1638	4.81954	0.058594
[truncated: 12 more columns]

## Sheet: δ13CWSC
P. orientalis	time	mark	δ13CWSC			Q. variabilis	time	mark	δ13CWSC
400-1-1	09:59:50	1	-27.405			400-1-1	10:09:27	1	-26.925
	09:59:51	1	-27.457				10:09:28	1	-27.074
400-1-2	10:15:31	3	-26.847			400-1-2	10:13:05	2	-27.697
	10:15:32	3	-26.931				10:13:05	2	-27.719
400-2-1	10:18:56	1	-27.164			400-2-1	10:17:43	1	-26.784
	10:18:56	1	-27.21				10:17:43	1	-26.961
400-2-2	10:22:36	2	-27.225			400-2-2	10:28:58	2	-27.204
	10:22:36	2	-27.197				10:28:59	2	-27.126
400-3-1	10:27:13	1	-26.949			400-3-1	11:26:45	1	-27.383
	10:27:13	1	-26.959				11:26:45	1	-27.014
400-3-2	10:30:52	2	-26.945			400-3-2	11:30:23	2	-27.444
	10:30:53	2	-26.758				11:30:23	2	-27.486
400-4-1	10:43:01	1	-26.46			400-4-1	12:10:31	2	-25.85
	10:43:02	1	-26.417				12:10:31	2	-26.079
400-4-2	10:45:07	2	-25.938			400-4-2	12:24:45	3	-26.385
	10:45:19	2	-25.991				12:24:46	3	-26.234
400-5-1	10:51:48	1	-26.89			400-5-1	10:56:50	1	-27.192
	10:51:49	1	-27.053				10:56:51	1	-27.233
400-5-2	10:54:21	2	-27.068			400-5-2	10:58:25	2	-27.534
	10:54:22	2	-27.01				10:58:25	2	-27.717
500-1-1	09:50:54	1	-26.543			500-1-1	10:17:53	1	-24.733
	09:50:54	1	-26.415				10:17:54	1	-24.843
500-1-2	10:15:11	2	-26.174			500-1-2	10:21:25	2	-25.328
	10:15:12	2	-25.909				10:21:25	2	-25.54
500-1-3	10:11:15	3	-26.574			500-2-1	10:38:32	1	-27.214
	10:11:16	3	-26.586				10:38:32	1	-27.07
500-2-1	10:19:10	1	-26.641			500-2-2	10:40:12	2	-28.104
	10:19:10	1	-26.747				10:40:12	2	-28.286
500-2-2	10:21:58	2	-26.888			500-3-1	10:30:22	1	-27.575
	10:21:59	2	-26.854				10:30:23	1	-27.511
500-3-1	10:32:50	1	-26.414			500-3-2	10:32:05	2	-27.174
	10:32:51	1	-26.568				10:32:05	2	-26.928
500-3-2	10:39:17	3	-26.462			500-4-1	10:42:57	1	-27.468
	10:39:17	3	-26.568				10:42:57	1	-27.331
500-4-1	11:11:45	1	-26.545			500-4-2	10:44:01	2	-27.58
	11:11:50	1	-26.435				10:44:02	2	-27.622
500-4-2	11:14:08	2	-26.018			500-5-1	10:24:38	1	-25.967
	11:14:08	2	-26.02				10:24:38	1	-25.695
500-5-1	11:20:41	1	-26.539			500-5-2	10:26:03	2	-26.208
	11:20:41	1	-26.664				10:26:03	2	-26.037
500-5-2	11:22:52	2	-26.267			600-1-1	11:08:26	1	-26.167
	11:22:52	2	-26.346				11:08:26	1	-26.241
600-1-1	09:39:00	1	-27.523			600-1-2	11:17:18	3	-26.574
	09:39:00	1	-27.397				11:17:19	3	-26.442
600-1-2	09:43:24	2	-27.007			600-2-1	11:37:37	2	-28.325
	09:43:25	2	-27.04				11:37:41	2	-28.217
600-2-1	09:58:49	1	-27.953			600-2-2	11:40:38	3	-27.635
	09:58:50	1	-27.982				11:40:38	3	-27.575
600-2-2	10:01:39	2	-27.027			600-3-1	11:43:42	1	-26.97
	10:01:40	2	-26.984				11:43:42	1	-27.021
600-3-1	10:11:22	1	-27.472			600-3-2	11:44:45	2	-28.526
	10:11:22	1	-27.426				11:44:45	2	-28.52
600-3-2	10:14:25	2	-27.119			600-4-1	12:01:49	1	-28.447
	10:14:26	2	-27.121				12:01:50	1	-28.352
600-4-1	10:20:53	1	-27.217			600-4-2	11:55:41	2	-28.265
	10:20:53	1	-27.151				11:55:42	2	-28.277
600-4-2	10:39:55	3	-27.078			600-5-1	12:05:03	1	-28.444
	10:39:55	3	-27.18				12:05:03	1	-28.482
600-5-1	10:50:11	1	-27.057			600-5-2	12:06:50	2	-29.288
	10:50:11	1	-26.962				12:06:50	2	-29.33
600-5-2	10:56:26	3	-26.591			800-1-1	09:47:37	1	-27.093
	10:56:27	3	-26.501				09:47:38	1	-27.052
800-1-1	11:25:13	1	-26.85			800-1-2	09:57:10	2	-27.176
800-1-2	11:29:22	2	-26.352				09:57:11	2	-27.225
800-2-1	11:43:15	1	-27.084			800-2-1	10:09:25	1	-29.668
800-2-2	11:54:26	2	-27.627				10:09:25	1	-29.835
800-3-1	12:03:32	1	-28.87			800-2-2	10:11:44	2	-28.615
800-3-2	12:06:05	2	-29.09				10:11:44	2	-28.664
800-4-1	12:15:31	1	-27.698			800-3-1	10:18:26	1	-28.363
800-4-2	12:27:29	3	-27.137				10:18:27	1	-28.325
800-5-1	12:34:00	2	-29.259			800-3-2	10:22:07	3	-28.676
800-5-2	12:35:55	3	-27.829				10:22:07	3	-28.604
						800-4-1	11:11:35	1	-28.478
							11:11:36	1	-28.34
						800-4-2	11:13:51	2	-27.968
							11:13:52	2	-27.961
						800-5-1	10:48:03	1	-29.946
							10:48:04	1	-29.994
						800-5-2	10:50:34	2	-30.315
							10:50:34	2	-30.346
