# Supplementary material for: Interaction of CO 2 concentrations and water stress in semiarid plants causes diverging response in instantaneous water use efficiency and carbon isotope composition
Source: Copernicus journal article supplement (doi:10.5194/bg-14-3431-2017), 2017-07-20
Supplement: Supplementary file [file bg-14-3431-2017-supplement-title-page.pdf › bg-14-3431-2017-supplement-title-page.pdf]

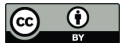

## *Supplement of*

# **Interaction of CO<sub>2</sub> concentrations and water stress in semiarid plants causes diverging response in instantaneous water use efficiency and carbon isotope composition**

Na Zhao et al.

*Correspondence to:* Xinxiao Yu ([yuxinxiao0707@126.com](mailto:yuxinxiao0707@126.com))

- [bg-14-3431-2017-supplement-title-page.pdf](#)
- [Raw data.xls](#)

The copyright of individual parts of the supplement might differ from the CC BY 3.0 License.
